# Supplementary material for: Comparative genomics of Lactobacillus kefiranofaciens ZW3 and related members of Lactobacillus. spp reveal adaptations to dairy and gut environments
Source: PubMed Central journal article supplement (PMC5634458; doi:10.1038/s41598-017-12916-0), 2017-10-09
Supplement: 41598_2017_12916_MOESM1_ESM.pdf [file 41598_2017_12916_MOESM1_ESM.pdf]

**Title:** Comparative genomics of *Lactobacillus kefiranofaciens* ZW3 and related members of *Lactobacillus*. spp reveal adaptations to dairy and gut environments

**Author:** Zhuqing Xing<sup>1,2</sup>, Weitao Geng<sup>1</sup>, Chao Li<sup>1</sup>, Ye Sun<sup>1</sup>, Yanping Wang<sup>1\*</sup>

**Name of the institute:** <sup>1</sup>Key Laboratory of Food Nutrition and Safety, Ministry of Education, Food Engineering and Biotechnology Institute, Tianjin University of Science & Technology, Tianjin 300457, China

<sup>2</sup>Chinese medical college of TJUTCM, Tianjin University of Traditional Chinese Medicine, Tianjin 300193, China

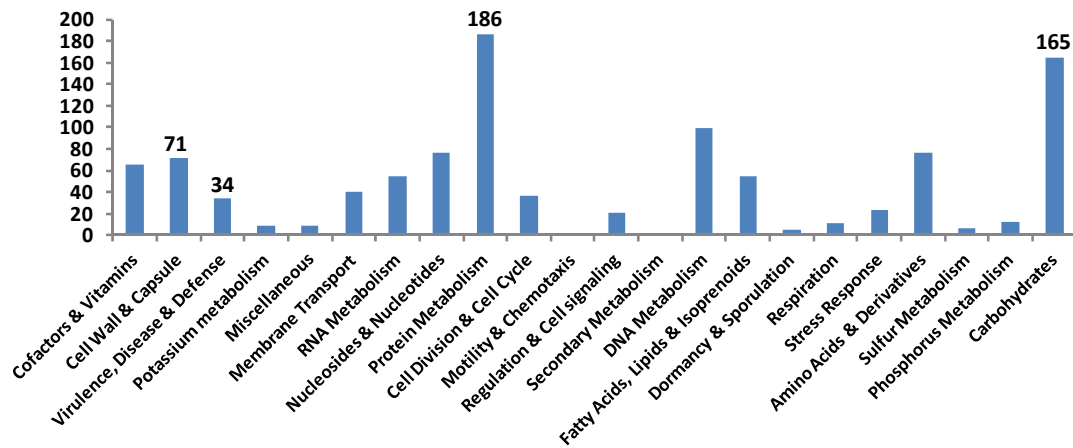

Fig. S1 Categorical distribution of the *Lactobacillus kefiranofaciens* ZW3 genome.

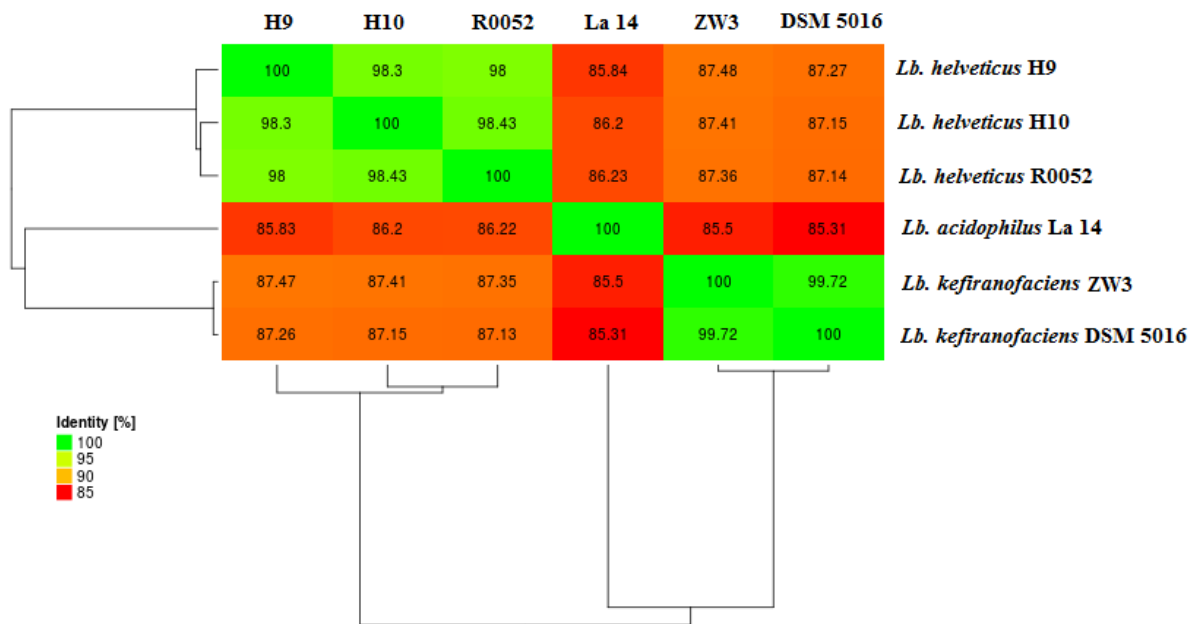

Fig. S3 Genomic heatmap based on AAI. The green colour represents a higher degree of similarity, and the red colour represents lower similarity.

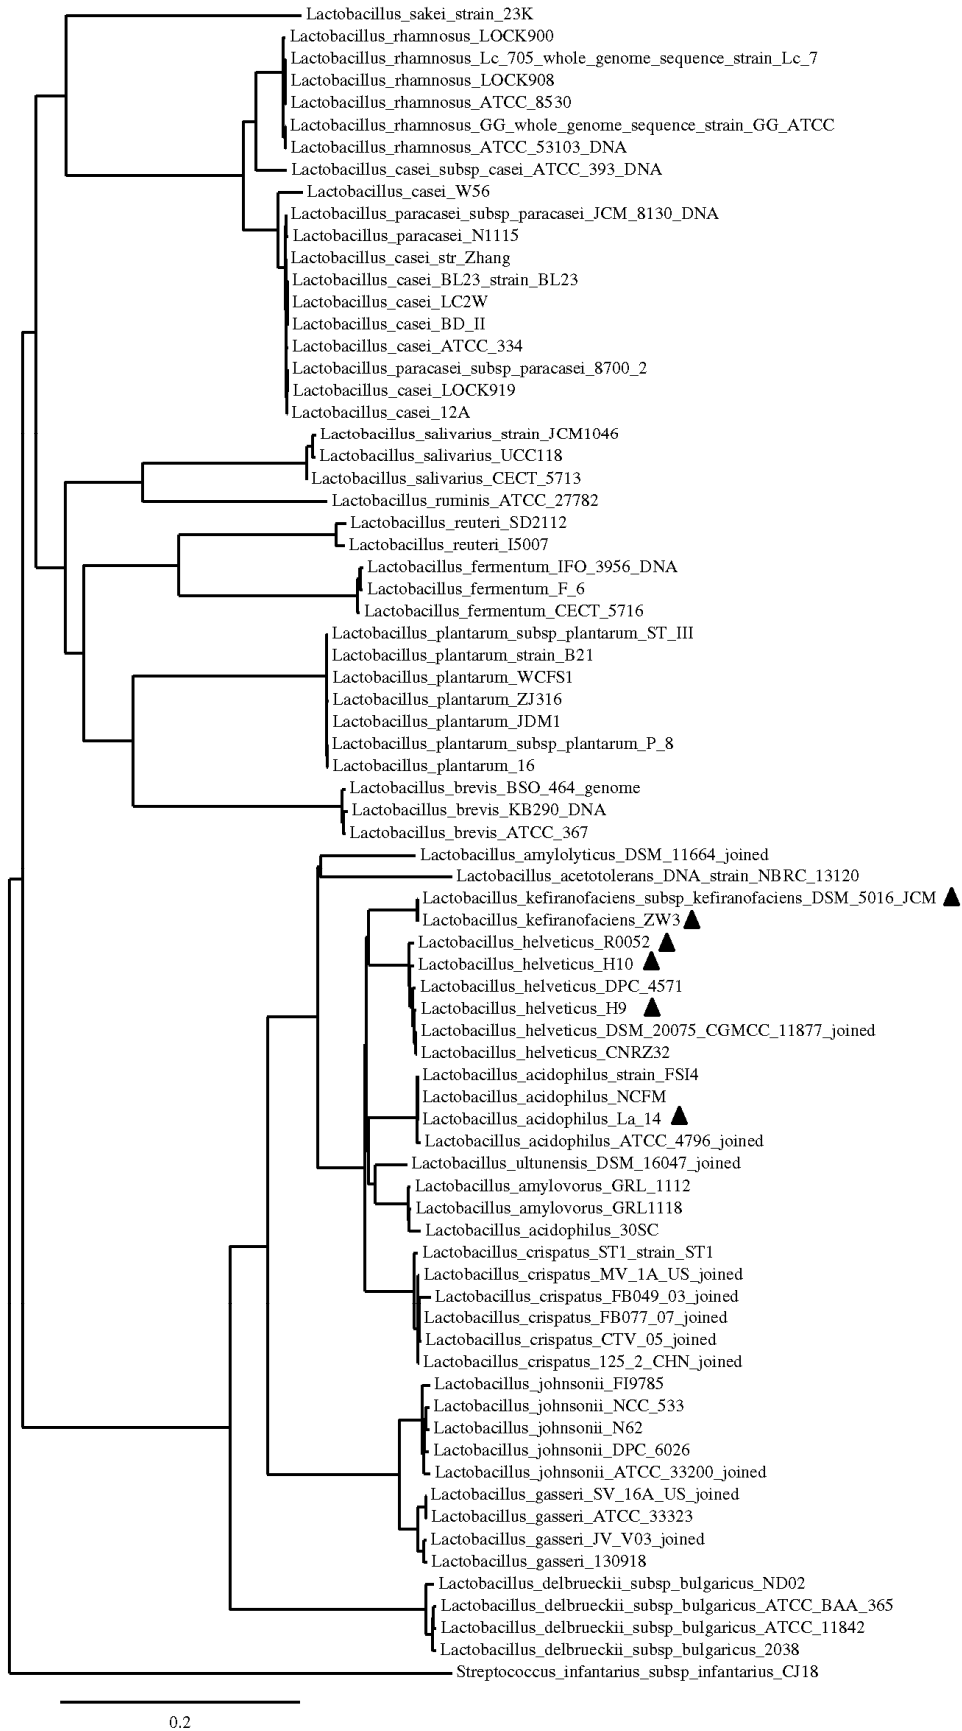

Fig. S2 Construction of a phylogenetic tree.

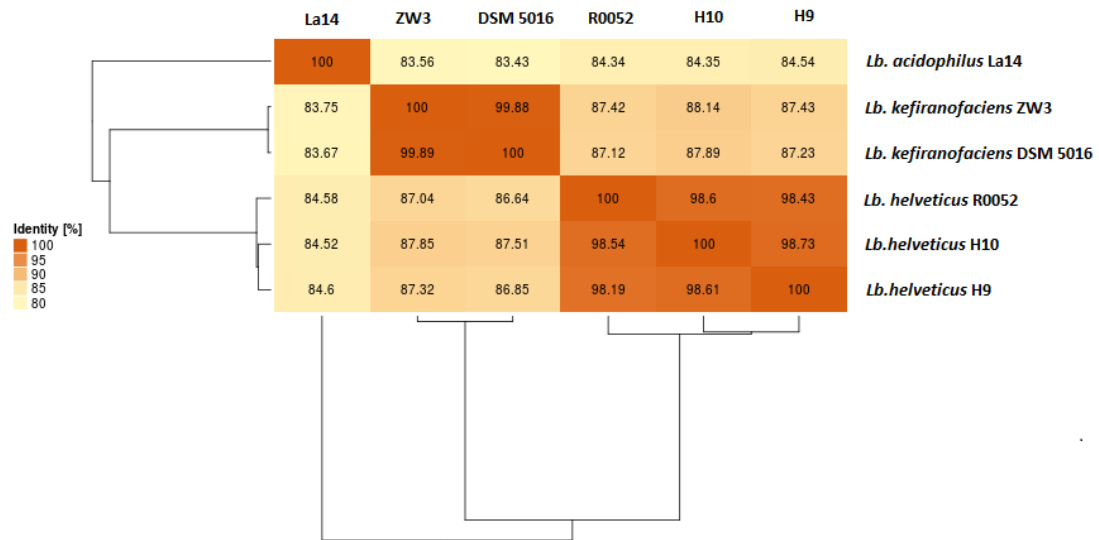

Fig. S4 Genomic heatmap based on ANI. The dark brown color represents a higher degree of similarity, and the light brown color represents lower similarity.

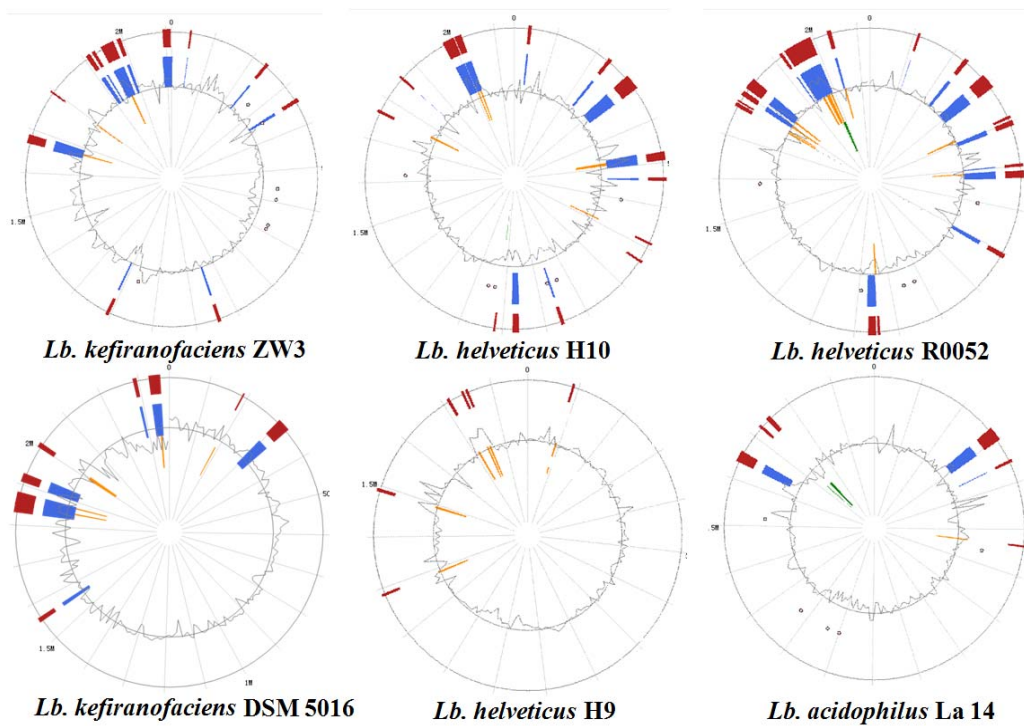

Fig. S5 GI analysis results.

(1. Predicted by at least one method (red); 2. predicted by IslandPath-DIMOB (blue); predicted by SIGI-HMM (yellow); predicted by IslandPick (green)).

Table S1 Comparison of old and new information on genes involved in sialic acid and extracellular polysaccharide synthesis

| Function          | Re-annotation                                                                                | Previous ID | Previous annotation                                                |
|-------------------|----------------------------------------------------------------------------------------------|-------------|--------------------------------------------------------------------|
|                   | glycerol-3-phosphate<br>cytidyltransferase                                                   | WANG_1283   | glycerol-3-phosphate<br>cytidyltransferase                         |
|                   | <i>epsIM</i> putative<br>glycosyltransferase<br>lipopolysaccharide                           | WANG_1284   | <i>EpsIM</i> , possible<br>glycosyltransferase                     |
|                   | cholinephosphotransferase<br><i>LicDI</i>                                                    | WANG_1285   | LPS biosynthesis protein                                           |
|                   | membrane protein involved in<br>the export of O-antigen, teichoic<br>acid lipoteichoic acids | WANG_1286   | <i>EpsN</i>                                                        |
|                   | beta-1,3-glycosyltransferase                                                                 | WANG_1287   | possible glycosyltransferase<br><i>WchA</i>                        |
|                   | hypothetical protein                                                                         | WANG_1288   | hypothetical protein                                               |
|                   | hypothetical protein                                                                         | WANG_1289   | hypothetical protein                                               |
|                   | maltose O-acetyltransferase                                                                  | WANG_1290   | hypothetical protein                                               |
| EPS<br>production | 2,3,4,5-tetrahydropyridine-2,6-di<br>carboxylate N-acetyltransferase                         | WANG_1291   | hypothetical protein                                               |
|                   | glycosyltransferase                                                                          | WANG_1292   | possible glycosyltransferase<br>protein                            |
|                   | glycosyl transferase <i>CpsG</i>                                                             | WANG_1293   | Glycosyl transferase family<br>protein                             |
|                   | UDP-N-acetylglucosamine:LPS<br>N-acetylglucosamine transferase                               | WANG_1294   | UDP-N-acetylglucosamine:LP<br>S N-acetylglucosamine<br>transferase |
|                   | undecaprenyl-phosphate<br>galactosephosphotransferase                                        | WANG_1295   | possible sugar-transferase                                         |
|                   | manganese-dependent<br>protein-tyrosine phosphatase                                          | WANG_1296   | exopolysaccharide<br>biosynthesis protein                          |
|                   | tyrosine-protein kinase <i>EpsD</i>                                                          | WANG_1297   | capsular polysaccharide<br>biosynthesis protein                    |
|                   | tyrosine-protein kinase<br>transmembrane modulator <i>EpsC</i>                               | WANG_1298   | exopolysaccharide<br>biosynthesis protein                          |

Table S1 Comparison of old and new information on genes involved in sialic acid and extracellular polysaccharide synthesis

| Function               | Re-annotation                                                | Previous ID | Previous annotation                                     |
|------------------------|--------------------------------------------------------------|-------------|---------------------------------------------------------|
| EPS production         | transcriptional regulator                                    | WANG_1299   | exopolysaccharide biosynthesis protein                  |
| sialic acid metabolism | PTS system,<br>N-acetylglucosamine-specific<br>IIA component | -           | -                                                       |
|                        | PTS system, mannose-specific<br>IIB component                | WANG_1202   | protein-N(Pi)-phosphohistidine-sugar phosphotransferase |
|                        | glucosamine-1-phosphate<br>N-acetyltransferase               | WANG_1843   | bifunctional protein <i>glmU</i>                        |
|                        | glucosamine-6-phosphate<br>deaminase                         | WANG_1498   | glucosamine-6-phosphate<br>deaminase                    |
|                        | glucosamine--fructose-6-phosphate<br>aminotransferase        | WANG_1196   | Glutamine-fructose-6-phosphate<br>transaminase          |
|                        | UDP-N-acetylglucosamine<br>2-epimerase                       | WANG_1027   | UDP-N-acetylglucosamine<br>2-epimerase                  |
|                        | PTS system,<br>N-acetylglucosamine-specific<br>IIB component | WANG_1036   | PTS enzyme II, ABC<br>component                         |
|                        | phosphoglucosamine mutase                                    | WANG_0939   | phosphoglucosamine mutase                               |
|                        | PTS system,<br>N-acetylglucosamine-specific<br>IIC component | -           | -                                                       |
|                        | N-acetylglucosamine-1-phosphate<br>uridylyltransferase       | WANG_1843   | bifunctional protein <i>glmU</i>                        |
|                        | N-acetylglucosamine-6-phosphate<br>deacetylase               | WANG_1700   | N-acetylglucosamine-6-P<br>deacetylase                  |
|                        | sialic acid utilization regulator,<br><i>RpiR</i> family     | WANG_1549   | transcriptional regulator                               |

Table S2 Information for experimental bacterial strains

| Strains                          | Application      | Source           |
|----------------------------------|------------------|------------------|
| <i>L. kefiranofaciens</i> ZW3    | Subject          | Laboratory stock |
| <i>L. kefiranofaciens</i> XL10   | Control          | Laboratory stock |
| <i>L. bulgaricus</i> CGMCC1.2161 | Control          | Laboratory stock |
| <i>E. coli</i> 442               | Indicator strain | Laboratory stock |
| <i>E. aerogenes</i> 435          | Indicator strain | Laboratory stock |
| <i>M. luteus</i> 444             | Indicator strain | Laboratory stock |
| <i>B. subtilis</i> 438           | Indicator strain | Laboratory stock |
| <i>S. enteritidis</i> 440        | Indicator strain | Laboratory stock |
| <i>S. mutans</i> 377             | Indicator strain | Laboratory stock |

Table S3 Information for bacterial strains

| Strains                            | Source                           | Accession No. |
|------------------------------------|----------------------------------|---------------|
| <i>Lb. kefiranofaciens</i> ZW3     | Kefir grains                     | CP002764.1    |
| <i>Lb. helveticus</i> H9           | Kurut                            | CP002427.1    |
| <i>Lb. helveticus</i> H10          | Tibet traditional fermented milk | CP002429.1    |
| <i>Lb. helveticus</i> R0052        | Sweet acidophilus milk           | CP003799      |
| <i>Lb. kefiranofaciens</i> DSM5016 | Kefir grains                     | AZGG00000000  |
| <i>Lb. acidophilus</i> La14        | Human                            | CP005926.2    |

Table. S3 Gene names, primers and amplification characteristics of RT-qPCR

| Gene                | Function                         | Primer sequences forward-reverse<br>(5'-3')        | T <sub>m</sub><br>(°C) | Product<br>length<br>(bp) | Position in genome                                                                      |
|---------------------|----------------------------------|----------------------------------------------------|------------------------|---------------------------|-----------------------------------------------------------------------------------------|
| <i>pgi</i>          | glucose-6-phosphate<br>isomerase | F: CAATTGCTTGCACCATTAC<br>R: CCCTTACCAATACGCTGC    | 55                     | 115                       | CP002764.1<br>992875-994212                                                             |
| <i>pgm</i>          | α-phosphoglucose<br>mutase       | F: TCAAGTGTTTCATTGCGAAGC<br>R: TTAAACCATTTGCCCGTG  | 55                     | 225                       | CP002764.1<br>1052405-1054129                                                           |
| <i>ugp</i>          | UDP-glucose<br>pyrophosphorylase | F: ACGTCCAGGCTTTTGATTG<br>R: GTAATGCAAGTGCCCTCACG  | 55                     | 201                       | CP002764.1<br>1120436-1121335                                                           |
| <i>uge</i>          | UDP-galactose<br>4-epimerase     | F: AAATGTGGGCGTCGATTAAG<br>R: GAAGAGTGCCCTTTCTGGTG | 55                     | 119                       | CP002764.1<br>302118-303110                                                             |
| <i>mpi</i>          | Mannose-6-phosphate<br>isomerase | F: TAGTCAAGGCGTGAATGGTG<br>R: TATGCAAGCAGATCCAGGTG | 55                     | 170                       | CP002764.1<br>999858-1000823                                                            |
| <i>16S<br/>rRNA</i> | 16S ribosomal RNA                | F: AAGCTGTCGCTAAAGGATG<br>R: GTCCCAATGTGGCCGATC    | 55                     | 111                       | CP002764.1<br>1350795-1352205;<br>125360-126770;<br>142503- 143913;<br>1818497- 1819907 |



Table S4 Genes involved in the metabolism of different carbohydrates

| Carbohydrates                                | Genes                                                                      | R0052                                                    | H10 | H9 | La 14 | DSM 5016 | ZW3 |
|----------------------------------------------|----------------------------------------------------------------------------|----------------------------------------------------------|-----|----|-------|----------|-----|
|                                              |                                                                            | Number                                                   |     |    |       |          |     |
| Lactose and galactose                        | Beta-galactosidase                                                         | 2                                                        | 2   | 2  | 2     | 1        | 1   |
|                                              | Lactose and galactose permease, GPH translocator family                    | 6                                                        | 6   | 5  | 1     | 2        | 3   |
|                                              | UDP-glucose 4-epimerase                                                    | 1                                                        | 1   | 1  | 1     | 1        | 1   |
|                                              | Galactokinase                                                              | 1                                                        | 1   | 1  | 1     | 1        | 1   |
|                                              | Aldose 1-epimerase                                                         | 1                                                        | 1   | 1  | 1     | 1        | 1   |
|                                              | Galactose operon repressor, GalR-LacI family of transcriptional regulators | 1                                                        | 1   | 1  | 1     | 1        | 1   |
|                                              | Galactose-1-phosphate uridylyltransferase                                  | 3                                                        | 4   | 3  | 3     | 3        | 3   |
|                                              | Alpha-galactosidase                                                        | -                                                        | 1   | 2  | 1     | 3        | 4   |
|                                              | Trehalose                                                                  | 1,4-alpha-glucan (glycogen) branching enzyme, GH-13-type | 1   | -  | -     | 1        | 1   |
| Trehalose phosphorylase                      |                                                                            | 1                                                        | 1   | -  | 1     | 1        | 1   |
| PTS system, trehalose-specific IIC component |                                                                            | 1                                                        | 1   | -  | 1     | -        | -   |
| Trehalose-6-phosphate hydrolase              |                                                                            | 1                                                        | 2   | -  | 1     | -        | -   |
| Beta-phosphoglucomutase                      |                                                                            | 1                                                        | 1   | -  | 1     | 1        | 1   |
| Maltose-6'-phosphate glucosidase             |                                                                            | 1                                                        | 1   | -  | 1     | 1        | 1   |
| Trehalose operon transcriptional repressor   |                                                                            | 1                                                        | 1   | -  | 1     | -        | -   |
| PTS system, trehalose-specific IIB component |                                                                            | 1                                                        | 1   | -  | 1     | -        | -   |
| Glucoside                                    |                                                                            | PTS system, cellobiose-specific IIB component            | 1   | -  | -     |          |     |
|                                              | Outer surface protein of unknown function, cellobiose operon               | 1                                                        | -   | -  | 3     | -        | -   |
|                                              | 6-phospho-beta-glucosidase                                                 | 5                                                        | -   | -  | 8     | -        | -   |
|                                              | PTS system, cellobiose-specific IIC component                              | 2                                                        | -   | -  | 9     | -        | -   |

Table S4 Genes involved in the metabolism of different carbohydrates

| Carbohydrates                     | Genes                                                                      | R0052  | H10 | H9 | La 14 | DSM<br>5016 | ZW3 |
|-----------------------------------|----------------------------------------------------------------------------|--------|-----|----|-------|-------------|-----|
|                                   |                                                                            | Number |     |    |       |             |     |
| Glucose                           | PTS system, beta-glucoside-specific IIB component                          | 1      | -   | -  | 5     | -           | -   |
|                                   | Beta-glucosidase                                                           | 1      | -   | -  | 2     | -           | -   |
|                                   | PTS system, beta-glucoside-specific IIA component                          | -      | -   | -  | 4     | -           | -   |
|                                   | PTS system, cellobiose-specific IIA component                              | -      | -   | -  | 1     | -           | -   |
|                                   | Cellobiose phosphotransferase system YdjC-like protein                     | -      | -   | -  | 1     | -           | -   |
|                                   | Beta-glucoside bgl operon antiterminator, BglG family                      | -      | -   | -  | 3     | -           | -   |
| Sucrose                           | Sucrose phosphorylase                                                      | 2      | -   | -  | 2     | 1           | 2   |
|                                   | Sucrose operon repressor ScrR, LacI family                                 | 1      | 1   | 2  | 1     | 1           | 1   |
|                                   | PTS system, sucrose-specific IIC component                                 | 2      | 3   | 2  | 2     | 2           | 3   |
|                                   | PTS system, sucrose-specific IIA component                                 | 1      | 1   | 1  | 1     | 1           | 1   |
|                                   | PTS system, sucrose-specific IIB component                                 | 2      | 3   | 2  | 2     | 2           | 3   |
|                                   | Fructokinase                                                               | 1      | 1   | 1  | 1     | 1           | 1   |
|                                   | Sucrose-6-phosphate hydrolase                                              | -      | -   | -  | 1     | -           | -   |
| Oligosaccharides<br>and raffinose | Raffinose operon transcriptional regulatory protein RafR                   | -      | -   | -  | 1     | 1           | 1   |
|                                   | Alpha-galactosidase                                                        | -      | -   | -  | 1     | 3           | 4   |
|                                   | Sucrose phosphorylase                                                      | -      | -   | -  | 2     | 1           | 2   |
|                                   | Multiple sugar ABC transporter, membrane-spanning permease<br>protein MsmG | -      | -   | -  | 2     | 1           | 2   |
|                                   | Glucan 1,6-alpha-glucosidase                                               | -      | -   | -  | 1     | -           | -   |
|                                   | Beta-glucosidase                                                           | -      | -   | -  | 2     | 1           | 1   |

Table S4 Genes involved in the metabolism of different carbohydrates

| Carbohydrates                                       | Genes                                                                            | R0052  | H10 | H9 | La 14 | DSM  | ZW3 |
|-----------------------------------------------------|----------------------------------------------------------------------------------|--------|-----|----|-------|------|-----|
|                                                     |                                                                                  |        |     |    |       | 5016 |     |
|                                                     |                                                                                  | Number |     |    |       |      |     |
| Oligosaccharides and raffinose                      | MSM (multiple sugar metabolism) operon regulatory protein                        | -      | -   | -  | 2     | 2    | 2   |
|                                                     | Sucrose-6-phosphate hydrolase                                                    | -      | -   | -  | 1     | -    | -   |
|                                                     | Multiple sugar ABC transporter, ATP-binding protein                              | -      | -   | -  | 2     | 2    | 2   |
|                                                     | Multiple sugar ABC transporter, membrane-spanning permease protein MsmF          | -      | -   | -  | 2     | 1    | 1   |
| Maltose and maltodextrin                            | Multiple sugar ABC transporter, substrate-binding protein                        | -      | -   | -  | -     | 1    | 2   |
|                                                     | Oligo-1,6-glucosidase                                                            | 1      | 1   | -  | 1     | 1    | 2   |
|                                                     | Maltose/maltodextrin ABC transporter, permease protein MalF                      | 1      | 1   | -  | -     | -    | 1   |
|                                                     | Maltose-6'-phosphate glucosidase                                                 | 1      | 1   | -  | 1     | 1    | 2   |
|                                                     | Neopullulanase                                                                   | 2      | 1   | -  | 2     | 2    | 3   |
|                                                     | Maltose/maltodextrin ABC transporter, substrate binding periplasmic protein MalE | 1      | 1   | -  | 1     | 2    | 2   |
|                                                     | Glycogen phosphorylase                                                           | 1      | -   | -  | 1     | 1    | 1   |
|                                                     | Maltose phosphorylase                                                            | 1      | 1   | -  | 1     | 1    | 1   |
|                                                     | Maltose O-acetyltransferase                                                      | 1      | 1   | -  |       | 1    | 1   |
|                                                     | Aldose 1-epimerase                                                               | 1      | 1   | -  | 1     | 1    | 1   |
|                                                     | Beta-phosphoglucomutase                                                          | 1      | 1   | -  | 1     | 1    | 1   |
|                                                     | Maltodextrin glucosidase                                                         | 1      | 1   | -  | 1     | -    | 1   |
|                                                     | Maltose operon transcriptional repressor MalR, LacI family                       | 1      | 1   | -  | 1     | 1    | 1   |
| Multiple sugar ABC transporter, ATP-binding protein | 1                                                                                | 1      | -   | 2  | 2     | 2    |     |

Table S4 Genes involved in the metabolism of different carbohydrates

| Carbohydrates               | Genes                                                                                                              | R0052  | H10 | H9 | La 14 | DSM<br>5016 | ZW3 |
|-----------------------------|--------------------------------------------------------------------------------------------------------------------|--------|-----|----|-------|-------------|-----|
|                             |                                                                                                                    | Number |     |    |       |             |     |
| Maltose and<br>maltodextrin | Maltose/maltodextrin ABC transporter, permease protein MalG                                                        | -      | 1   | -  | 1     | 1           | 1   |
|                             | Pullulanase                                                                                                        | -      | -   | -  | 1     | -           | -   |
|                             | Maltose/maltodextrin transport ATP-binding protein MalK                                                            | -      | -   | -  | 1     | -           | -   |
|                             | Maltose/maltodextrin ABC transporter, permease protein MalF                                                        | -      | -   | -  | 1     | 1           | -   |
|                             | Mlc, transcriptional repressor of MalT (the transcriptional activator<br>of maltose regulon) and the manXYZ operon | -      | -   | -  | 1     | -           | -   |
